# Supplementary material
Source: PubMed Central journal article supplement (PMC3690923)
Supplement: NIHMS472895-supplement-Supp_Data_S1.pdf [file NIHMS472895-supplement-Supp_Data_S1.pdf]

## **Search strategy for NIH RePORTER**

NIH RePORTER search on January 23, 2012

- Fiscal Year: 2000-2011
- Text Search: “Emergency”
- Activity Code: K08 and K23
- Award Type: New

Fiscal year runs from October 1 to September 30; text search includes search of project titles, abstracts, and scientific terms; new award types do not include renewals or revisions/supplements.

Because NIH RePORTER does not allow searches by specialty, individuals identified in the NIH RePORTER search were further reviewed through academic websites to determine if the awardee completed an EM residency or fellowship. We identified awardee organization (typically academic institutions) at the time of K award through NIH RePORTER. These academic websites were then searched for faculty profiles to determine if the K awardee met inclusion criteria. If we were unable to identify the K awardee at the awardee organization, we conducted a web search of the name of the K awardee to identify the current academic organization of the awardee and these academic organizations were similarly searched for faculty profiles. Using this strategy we located the faculty profiles of all the K awardees.
