# Supplementary material
Source: PubMed Central journal article supplement (PMC3690923)
Supplement: NIHMS472895-supplement-Supp_Data_S2.pdf [file NIHMS472895-supplement-Supp_Data_S2.pdf]

**eSurvey**  
**K08 and K23 Awardee Survey**

Please complete the survey below.

CAUTION: Do not press the browser "Back" button or you could lose your work! Thank you!

Daniel Nishijima, MD  
Department of Emergency Medicine, UC-Davis

Kabir Yadav, MD  
Larissa May, MD  
Department of Emergency Medicine, The George Washington University

D. Mark Courtney, MD  
Chair, Society for Academic Emergency Medicine Research Committee

Do you consent to participating in this survey?  
(please review information sheet below)

Yes  
 No

Survey Information Sheet

---

---

## Awardee Attributes

Awardee Last Name \_\_\_\_\_

Awardee First Name \_\_\_\_\_

Age when award began \_\_\_\_\_

Gender  Female  
 Male

Race / Ethnicity (check all that apply)  White  
 Black or African American  
 American Indian, Pacific Islander or Alaska Native  
 Asian  
 Hispanic or Latino  
 Other race/ethnicity

If other race/ethnicity, please specify: \_\_\_\_\_

Did you complete a research fellowship prior to your K award?  Yes  
 No

What year did you complete residency? (YYYY) \_\_\_\_\_

What degrees did you hold prior to your award? (check all that apply)  MD/DO (or equivalent)  
 MS  
 MPH  
 MA  
 MAS  
 PhD  
 Other degree

If other degree, please specify: \_\_\_\_\_

What year did you complete your most recent degree? (YYYY) \_\_\_\_\_

Was your K award primary mentor from emergency medicine?  Yes  
 No

Was your K award primary mentor from your institution?  Yes  
 No

Did you have a training award prior to your K award?  Yes  
 No

Which of the following training awards did you have prior to receiving your individual K award? (check all that apply)  EMF career development award  
 SAEM training award  
 KL2  
 K12  
 F32  
 T32  
 NIH LRP  
 RWJ  
 Other training award

If other training award, please specify: \_\_\_\_\_

Prior to your K award, did you ever have other federal funding? (NIH, AHRQ, CDC, etc)  Yes  
 No

What federal institute and what kind of federal award? \_\_\_\_\_

What role did you have in this federal award? (PI, co-PI, co-investigator, etc) \_\_\_\_\_

Prior to your K award, did you ever have institutional funding? (departmental, intramural)

- Yes
- No

Prior to your K award, did you ever have non-federal non-institutional funding? (foundation, industry)

- Yes
- No

What organization and what kind of award?

\_\_\_\_\_

What was your role? (PI, co-PI, co-investigator, etc)

\_\_\_\_\_

Number of peer-reviewed publications prior to K award?

\_\_\_\_\_

Did you publish under any other names?

- Yes
- No

Please provide us with the other names you have published under:

\_\_\_\_\_

Academic title at time of your K award

- None
- Instructor (or equivalent)
- Assistant Professor (or equivalent)
- Associate Professor (or equivalent)
- Professor (or equivalent)

How many times did you apply for an independent K (K08, K23) career development award? (Including your successful award)

\_\_\_\_\_

Area of research (check all that apply)

- Abdominal/Gastrointestinal
  - Airway Management
  - Alcohol/Drug-Related Emergencies
  - Alternative Therapies
  - Burns
  - Cardiovascular Emergencies
  - Clinical Guidelines
  - Clinical Pharmacology
  - Critical Care
  - Cutaneous Disorders/Dermatology
  - Diagnostic Testing (Non-Imaging)
  - Disaster Medicine
  - Domestic Violence
  - Educational Concepts/Teaching
  - Emergency Medical Services
  - Environmental Emergencies
  - Epidemiology
  - Ethics
  - Genitourinary Emergencies
  - Geriatrics
  - Health Policy/Health Care Delivery
  - Hematologic Emergencies
  - Hyperbaric Medicine
  - Immunologic Disorders
  - Infectious Diseases
  - Informatics
  - Injury Prevention/Injury Control
  - International Emergency Medicine
  - Managed Care
  - Medical Economics
  - Medical Error
  - Medical Imaging
  - Medical Legal Issues
  - Metabolic Disorders
  - Neurology
  - Observation Medicine/Observation Units
  - Obstetrics/Gynecology Ophthalmology
  - Orthopedics/Musculoskeletal Disorders
  - Outcomes/Cost-Effectiveness
  - Pain Management
  - Palliative/End of Life care
  - Pediatrics
  - Public Health
  - Pulmonary/Respiratory
  - Psychobehavioral Emergencies
  - Resuscitation, Neonatal
  - Resuscitation, Out-of-hospital
  - Resuscitation, Pediatric
  - Sexual Assault
  - Sports Medicine
  - Technology Assessment
  - Toxicology
  - Trauma
  - Ultrasound
  - Wound Management/Healing
  - Other area of research
  - If other area of research, please specify:
-

---



---

**Outcomes**

Did you earn a degree during your K award (or expect to)?

- Yes  
 No

What degree did you earn during your K award (or expect to)?

- MS  
 MPH  
 MA  
 MAS  
 PhD  
 Other

If other, please specify:

\_\_\_\_\_

Number of peer-reviewed publications during and following K award?

\_\_\_\_\_

Were you awarded a federal R01-type award as a PI/co-PI?

- Yes  
 No

What federal institute was your R01-type award from?

\_\_\_\_\_

What type of federal R01-type award? (check all that apply)

- R01  
 DP2  
 R23  
 R29  
 R37  
 Other

Please specify other R01-type award:

\_\_\_\_\_

Have you changed institutions between your K award and your R01-type award?

- Yes  
 No

Please provide the name of your academic institution for your R01-type award:

\_\_\_\_\_

How many R01 applications have you submitted? (0 for never applied)

\_\_\_\_\_

Have been awarded a non-R01-type federal award as a PI/co-PI?

- Yes  
 No

What type of non-R01-type federal award? (check all that apply)

- P01 program projects  
 R03  
 R15  
 R21  
 SBIR/STTR (R41, R42, R43, R44, U43, U44)  
 cooperative agreements (Us)  
 other type

If "other type," what type of mechanism?

\_\_\_\_\_

Have you changed institutions between your K award and your non-R01-type award?

- Yes  
 No

Please provide the name of your academic institution for your non-R01-type award:

\_\_\_\_\_

How many non-R01-type federal award applications have you submitted? (0 for none)

\_\_\_\_\_

Since K was awarded, how many times have you been funded as a co-investigator on any federal award? (0 for never)

\_\_\_\_\_

What percent of your time is currently dedicated to research (0-100)

---

Why are you no longer conducting research?

---

How your research is currently supported? (check all that apply)

- HHS Federal (NIH, CDC, AHRQ)
- Other Federal (specify below)
- State
- Industry
- Intramural
- Other Support
- Not Supported

Please specify federal institutes or companies of funding:

---

What is your current academic title?

- None
- Instructor (or equivalent)
- Assistant Professor (or equivalent)
- Associate Professor (or equivalent)
- Professor (or equivalent)
- Other

If "Other," please specify:

---

What administrative roles do you currently hold?

- Chair
- Vice-chair
- Research director
- Research fellowship director
- Other
- None

If "Other," please specify:

---

Please provide the name of your current academic institution

---

Would you be willing to be interviewed to better understand how you succeeded as an emergency medicine clinical researcher?

- Yes
- No

Thank you, please provide an email address:

---
