# Supplementary material
Source: PubMed Central journal article supplement (PMC3690923)
Supplement: NIHMS472895-supplement-Supp_Data_S3.pdf [file NIHMS472895-supplement-Supp_Data_S3.pdf]

**Data Supplement S3**

| Table 1. Characteristics from emergency medicine K awardees, n=45              |              |
|--------------------------------------------------------------------------------|--------------|
| <b>Characteristic</b>                                                          | <b>n (%)</b> |
| Age, median (IQR)                                                              | 36 (35-38)   |
| Male                                                                           | 33 (73.3)    |
| Race/ethnicity                                                                 |              |
| - Black or African American                                                    | 1 (2.2)      |
| - American Indian or Pacific Islander or Alaska Native                         | 0 (0)        |
| - Asian                                                                        | 13 (28.9)    |
| - Hispanic or Latino                                                           | 2 (4.4)      |
| - Other race/ethnicity                                                         | 0 (0)        |
| - No response                                                                  | 2 (4.4)      |
| Years from residency to K award, median (IQR)                                  | 6 (4-7)      |
| Completed research fellowship prior to K award                                 | 27 (60.0)    |
| Any advanced degree other than MD/DO prior to K award                          | 26 (57.8)    |
| Degrees prior to award                                                         |              |
| - MD/DO                                                                        | 42 (93.3)    |
| - MS (Master of Science)                                                       | 13 (28.9)    |
| - MPH (Master of Public Health)                                                | 9 (20.0)     |
| - MA (Master of Arts)                                                          | 1 (2.2)      |
| - MAS (Master of Advanced Studies)                                             | 1 (2.2)      |
| - PhD (Doctor of Philosophy)                                                   | 2 (4.4)      |
| - MSCE (Master of Science in Clinical Epidemiology)                            | 1 (2.2)      |
| Primary mentor on K award is from emergency medicine                           | 11 (24.4)    |
| Primary mentor on K award is at same institution                               | 43 (95.6)    |
| Career development award prior to K award                                      | 18 (40.0)    |
| - Emergency Medicine Foundation                                                | 4 (8.9)      |
| - Society of Academic Medicine                                                 | 2 (4.4)      |
| - KL2                                                                          | 1 (2.2)      |
| - K12                                                                          | 2 (4.4)      |
| - F32                                                                          | 2 (4.4)      |
| - T32                                                                          | 3 (6.7)      |
| - Robert Wood Johnson Clinical Scholar Program                                 | 2 (4.4)      |
| - Other prior career development award                                         | 8 (17.8)     |
| Federal funding prior to K award                                               | 8 (17.8)     |
| Institutional funding (departmental or intramural) prior to K award            | 36 (80.0)    |
| Foundation or industry funding prior to K award                                | 29 (64.4)    |
| Any funding (federal, institutional, foundation, or industry) prior to K award | 45 (100)     |
| Academic title at time of K award                                              |              |
| - Assistant Professor                                                          | 38 (84.4)    |
| - Associate Professor                                                          | 2 (4.4)      |
| - Instructor                                                                   | 5 (11.1)     |
| Number of applications for K award (including award)                           |              |
| - one                                                                          | 25 (55.6)    |
| - two                                                                          | 7 (15.6)     |

|                                                                              |           |
|------------------------------------------------------------------------------|-----------|
| - three                                                                      | 12 (26.7) |
| - four                                                                       | 0 (0)     |
| - five or more                                                               | 1 (2.2)   |
| Obtained an advanced degree during K award                                   | 16 (35.6) |
| - MS                                                                         | 7 (15.6)  |
| - MPH                                                                        | 4 (8.9)   |
| - MA                                                                         | 1 (2.2)   |
| - MAS                                                                        | 1 (2.2)   |
| - PhD                                                                        | 3 (6.7)   |
| Principal Investigator (PI) or co-PI on R01 equivalent awarded since K award | 10 (22.2) |
| PI or co-PI on R01 equivalent application since K award                      | 22 (48.9) |
| Number of R01 equivalent applications since K award                          |           |
| - one                                                                        | 8 (17.8)  |
| - two                                                                        | 7 (15.6)  |
| - three                                                                      | 2 (4.4)   |
| - four                                                                       | 2 (4.4)   |
| - five or more                                                               | 3 (6.7)   |
| PI or co-PI on federal non-R01 awarded since K award                         | 10 (22.2) |
| PI or co-PI on federal non-R01 application since K award                     | 24 (53.3) |
| Number of federal non-R01 applications since K award                         |           |
| - one                                                                        | 9 (20.0)  |
| - two                                                                        | 7 (15.6)  |
| - three                                                                      | 1 (2.2)   |
| - four                                                                       | 2 (4.4)   |
| - five or more                                                               | 5 (11.1)  |
| Percent of time currently dedicated to research activities                   |           |
| - 50% or greater                                                             | 34 (75.6) |
| - 75% or greater                                                             | 27 (60.0) |
| Current administrative positions                                             |           |
| - Department/division chair                                                  | 0 (0)     |
| - Department/division vice-chair                                             | 8 (17.8)  |
| - Research director                                                          | 10 (22.2) |
| - Research fellowship director                                               | 2 (4.4)   |
| - Other administrative position                                              | 11 (24.4) |

| Area of specialty                  | n (%)    |
|------------------------------------|----------|
| Cardiovascular emergencies         | 8 (17.8) |
| Neurology                          | 6 (13.3) |
| Other area of research             | 6 (13.3) |
| Geriatrics                         | 5 (11.1) |
| Public health                      | 5 (11.1) |
| Toxicology                         | 5 (11.1) |
| Critical care                      | 4 (8.9)  |
| Emergency medical services         | 4 (8.9)  |
| Epidemiology                       | 4 (8.9)  |
| Outcomes/cost-effectiveness        | 4 (8.9)  |
| Infectious diseases                | 3 (6.7)  |
| Pain management                    | 3 (6.7)  |
| Pulmonary/respiratory              | 3 (6.7)  |
| Trauma                             | 3 (6.7)  |
| Alcohol/drug-related emergencies   | 2 (4.4)  |
| Clinical guidelines                | 2 (4.4)  |
| Domestic violence                  | 2 (4.4)  |
| Health policy/health care delivery | 2 (4.4)  |
| Injury prevention/injury control   | 2 (4.4)  |
| Medical imaging                    | 2 (4.4)  |
| Pediatrics                         | 2 (4.4)  |
| Ultrasound                         | 2 (4.4)  |
| Cutaneous disorders/dermatology    | 1 (2.2)  |
| Educational concepts/teaching      | 1 (2.2)  |
| Ethics                             | 1 (2.2)  |
| Hematologic emergencies            | 1 (2.2)  |
| Medical error                      | 1 (2.2)  |
| Obstetrics/gynecology              | 1 (2.2)  |
| Psychobehavioral emergencies       | 1 (2.2)  |
| Resuscitation, pediatric           | 1 (2.2)  |
| Wound management/healing           | 1 (2.2)  |
| Abdominal/gastrointestinal         | 0 (0)    |
| Airway management                  | 0 (0)    |
| Alternative therapies              | 0 (0)    |
| Burns                              | 0 (0)    |
| Clinical pharmacology              | 0 (0)    |
| Diagnostic testing (non-imaging)   | 0 (0)    |
| Disaster medicine                  | 0 (0)    |
| Environmental emergencies          | 0 (0)    |
| Genitourinary emergencies          | 0 (0)    |
| Hyperbaric medicine                | 0 (0)    |
| Immunologic disorders              | 0 (0)    |
| Informatics                        | 0 (0)    |
| International emergency medicine   | 0 (0)    |

|                                        |       |
|----------------------------------------|-------|
| Managed care                           | 0 (0) |
| Medical economics                      | 0 (0) |
| Medical legal Issues                   | 0 (0) |
| Metabolic disorders                    | 0 (0) |
| Observation medicine/observation units | 0 (0) |
| Ophthalmology                          | 0 (0) |
| Orthopedics/musculoskeletal disorders  | 0 (0) |
| Palliative/end-of-life care            | 0 (0) |
| Resuscitation, neonatal                | 0 (0) |
| Resuscitation, out-of-hospital         | 0 (0) |
| Sexual assault                         | 0 (0) |
| Sports medicine                        | 0 (0) |
| Technology assessment                  | 0 (0) |

\* more than one may be selected
